# Supplementary material
Source: publisher site journal article supplement (https://www.dovepress.com/get_supplementary_file.php?f=223045.docx)
Supplement: Supplementary file 1 [file get_supplementary_file.php]

SUPPLEMENTAL MATERIAL

Article Title: Association between supplemental private health insurance and burden of out-of-pocket healthcare expenditure in China: a novel approach to estimate two-part model with random effects using panel data

Journal Name: Risk Management and Healthcare Policy

Author Names: Yawen Jiang, Weiyi Ni

Affiliation and E-Mail Address of the Corresponding Author: Sun Yat-sen University School of Public Health (Shenzhen); [jiangyw26@mail.sysu.edu.cn](mailto:jiangyw26@mail.sysu.edu.cn)

Appendix 1. Incremental effect

Based on equation (5) in the main text, the incremental effect is

.

Appendix 2. Estimation of the standard error of the marginal effects using the delta method

Using equation (6) in the main text as an example, the marginal effect

is calculated using the estimated or predicted values for , for , for , for , a for . These estimated and predicted values and their variance-covariance matrix are estimated by Stata as part of its post-estimation capacity when the equations of the two parts are estimated in one step. The delta method states that for a multivariate prediction , , where is the prediction of interest and is the Jacobian matrix.
